# Supplementary material for: Construction of hierarchical IrTe nanotubes with assembled nanosheets for overall water splitting electrocatalysis
Source: Royal Society of Chemistry journal article supplement (doi:10.1039/d1ta01839f), 2021-01-01
Supplement: d1ta01839f1.pdf [file d1ta01839f1.pdf]

Electronic Supplementary Information for

**Construction of hierarchical IrTe nanotubes with assembled nanosheets for  
overall water splitting electrocatalysis**

Ziqiang Wang, Peng Wang, Hugang Zhang, Wenjing Tian, You Xu, Xiaonian Li, Liang Wang\* and  
Hongjing Wang\*

State Key Laboratory Breeding Base of Green-Chemical Synthesis Technology, College of  
Chemical Engineering, Zhejiang University of Technology, Hangzhou 310014, P. R. China

**Corresponding authors**

\*E-mail: wangliang@zjut.edu.cn.

\*E-mail: hjw@zjut.edu.cn.

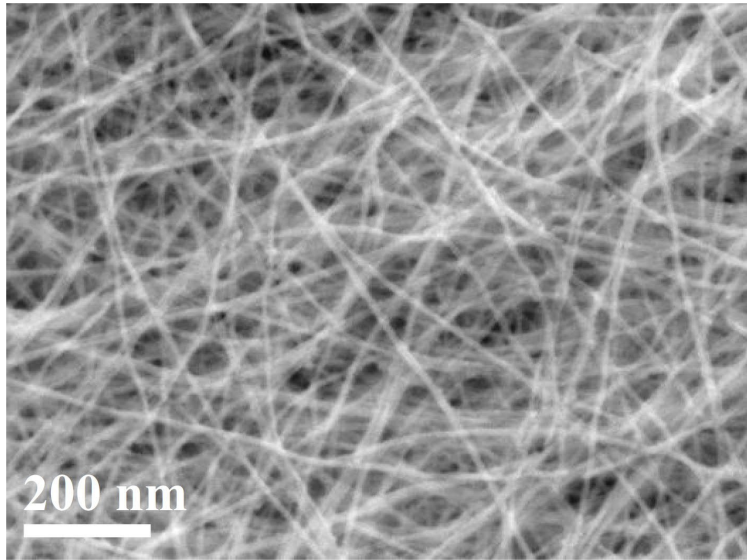

Fig. S1 SEM image of the Te NWs.

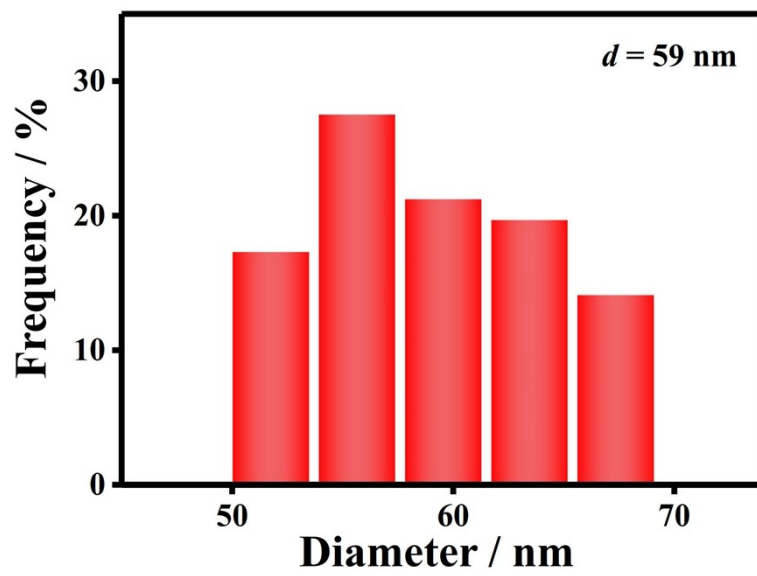

Fig. S2 Histogram of the diameter of IrTe NTs.

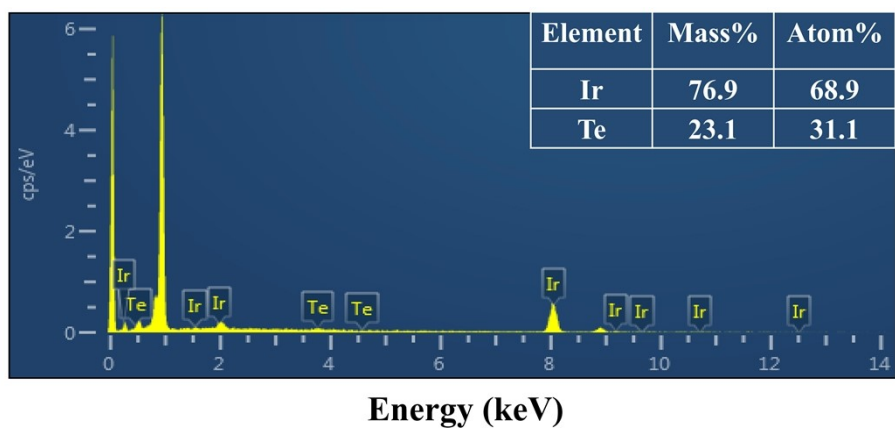

**Fig. S3** EDX spectrum of the IrTe NTs.

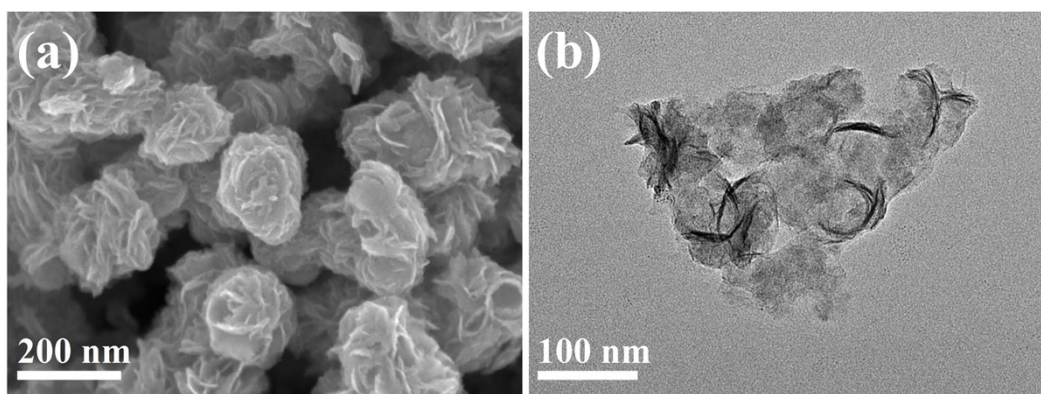

**Fig. S4** (a) SEM and (b) TEM images of Ir NSs.

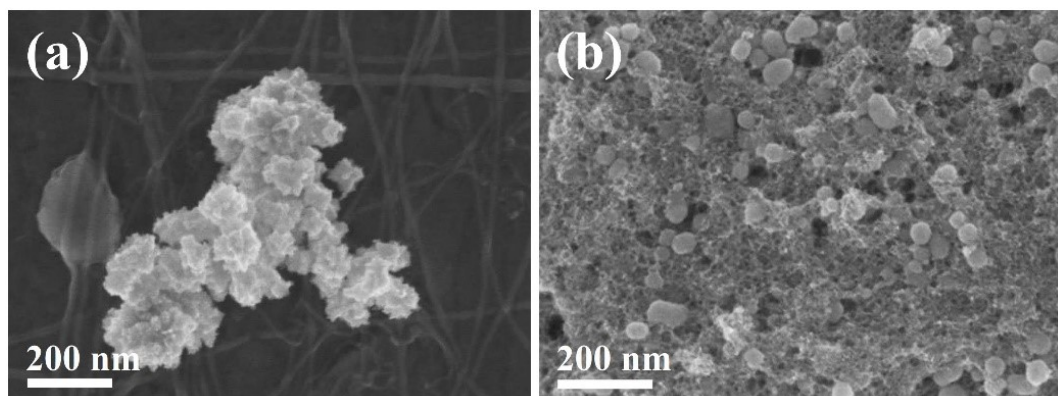

**Fig. S5** SEM images of the samples obtained by replacing formic acid with (a) L-ascorbic acid and (b)  $\text{NaBH}_4$ .

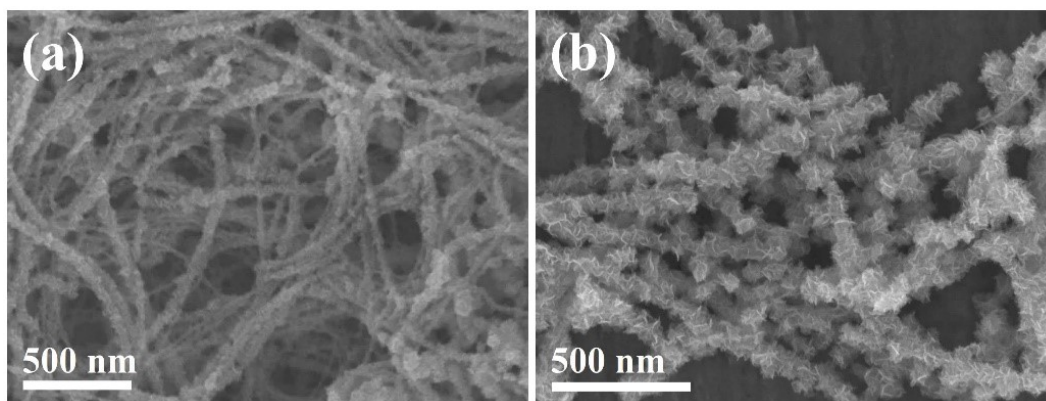

**Fig. S6** SEM images of the samples prepared with (a) 5 mM and (b) 20 mM  $\text{IrCl}_3$ .

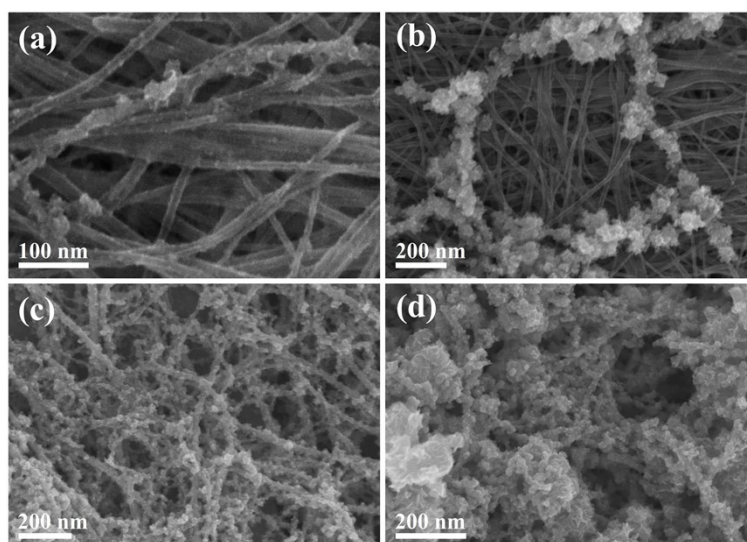

**Fig. S7** SEM images of the samples prepared at different reaction times in the typical synthesis conditions: (a) 0.5 h, (b) 1 h, (c) 2 h and (d) 4 h.

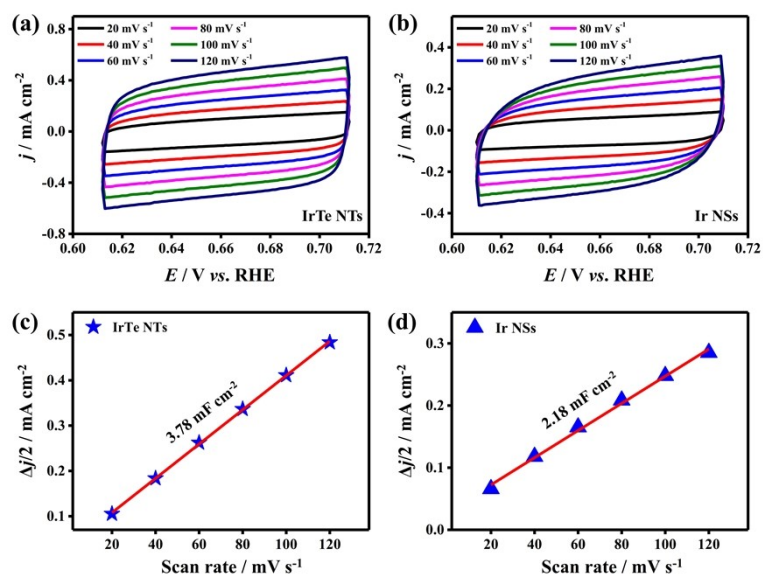

**Fig. S8** Cyclic voltammograms for (a) IrTe NTs and (b) Ir NSs recorded in the same potential range with increasing scan rates. Capacitive current densities at 0.66 V derived from CVs against scan rates for (c) IrTe NTs, (d) Ir NSs.

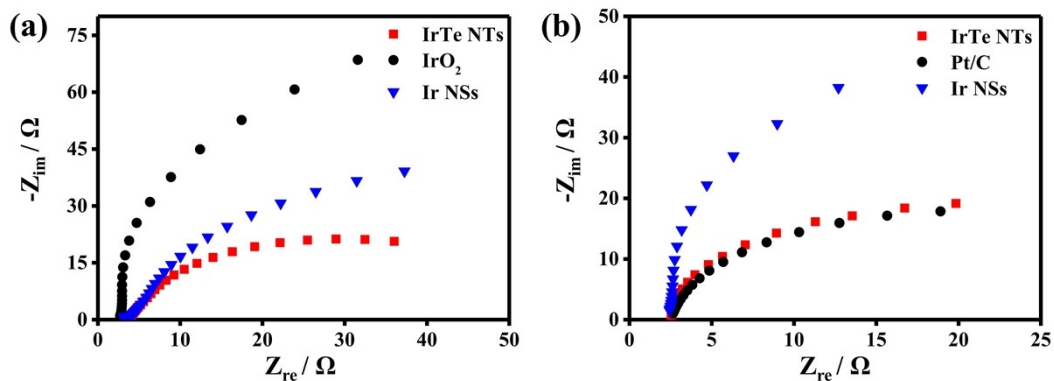

**Fig. S9** Nyquist plots for different catalysts recorded at (a) 1.49 V (vs. RHE) and (b) -0.1 V (vs. RHE). The frequency ranges from 100 kHz to 0.1 Hz.

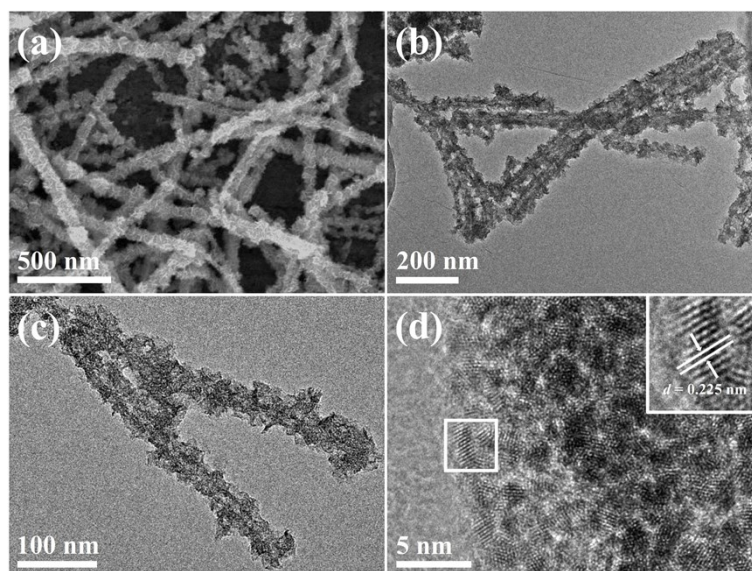

**Fig. S10** SEM (a), TEM (b, c) and HRTEM (d) images of the IrTe NTs after the stability test. The inset in (d) reveals the square area of the Fourier-filtered lattice.

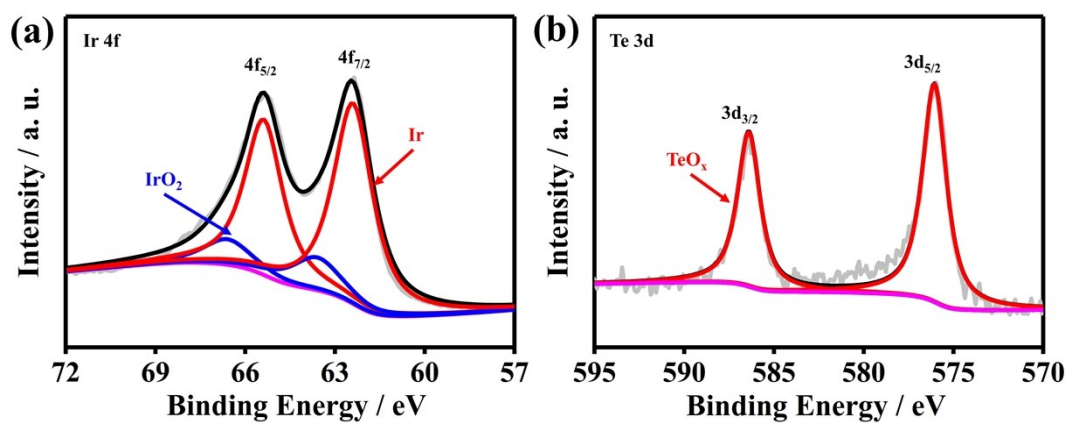

**Fig. S11** Ir 4f (a) and Te 3d (b) XPS spectra of IrTe NTs after the stability test.

**Table S1.** Comparisons of the OER activity for the IrTe NTs and some recently reported catalysts.

| <b>Catalysts</b> | <b>Electrolyte</b>                       | <b>Current density</b>       | <b><math>\eta</math> (mV)</b> | <b>Ref.</b>      |
|------------------|------------------------------------------|------------------------------|-------------------------------|------------------|
| <b>IrTe NTs</b>  | <b>0.5 M H<sub>2</sub>SO<sub>4</sub></b> | <b>10 mA cm<sup>-2</sup></b> | <b>271</b>                    | <b>This work</b> |
| IrTe NTs         | 0.1 M HClO <sub>4</sub>                  | 10 mA cm <sup>-2</sup>       | 290                           | 1                |
| Ir WNWs          | 0.1 M HClO <sub>4</sub>                  | 10 mA cm <sup>-2</sup>       | 280                           | 2                |
| IrNi NCs         | 0.1 M HClO <sub>4</sub>                  | 10 mA cm <sup>-2</sup>       | 280                           | 3                |
| Ir-Ni oxide      | 0.1 M HClO <sub>4</sub>                  | 10 mA cm <sup>-2</sup>       | 310                           | 4                |
| Co-IrCu ONC/C    | 0.1 M HClO <sub>4</sub>                  | 10 mA cm <sup>-2</sup>       | ~293                          | 5                |
| IrNiCu DNF/C     | 0.1 M HClO <sub>4</sub>                  | 10 mA cm <sup>-2</sup>       | 300                           | 6                |
| IrOx-Ir          | 0.5 M H <sub>2</sub> SO <sub>4</sub>     | 10 mA cm <sup>-2</sup>       | 290                           | 7                |
| 3D IrRuMn sphere | 0.5 M HClO <sub>4</sub>                  | 10 mA cm <sup>-2</sup>       | 260                           | 8                |
| IrNi NFs         | 0.1 M HClO <sub>4</sub>                  | 10 mA cm <sup>-2</sup>       | 293                           | 9                |
| Ni-Ir NCs        | 0.05 M H <sub>2</sub> SO <sub>4</sub>    | 10 mA cm <sup>-2</sup>       | 302                           | 10               |

**Table S2.** Comparisons of the HER activity for the IrTe NTs and some recently reported catalysts.

| <b>Catalysts</b>                                                  | <b>Electrolyte</b>                       | <b>Current density</b>       | <b><math>\eta</math> (mV)</b> | <b>Ref.</b>      |
|-------------------------------------------------------------------|------------------------------------------|------------------------------|-------------------------------|------------------|
| <b>IrTe NTs</b>                                                   | <b>0.5 M H<sub>2</sub>SO<sub>4</sub></b> | <b>10 mA cm<sup>-2</sup></b> | <b>36</b>                     | <b>This work</b> |
| IrNi NCs                                                          | 0.5 M H <sub>2</sub> SO <sub>4</sub>     | 20 mA cm <sup>-2</sup>       | 32                            | 3                |
| Ru/C <sub>3</sub> N <sub>4</sub> /C                               | 0.5 M H <sub>2</sub> SO <sub>4</sub>     | 10 mA cm <sup>-2</sup>       | 70                            | 11               |
| Rh/Si                                                             | 0.5 M H <sub>2</sub> SO <sub>4</sub>     | 50 mA cm <sup>-2</sup>       | 110                           | 12               |
| Rh-MoS <sub>2</sub>                                               | 0.5 M H <sub>2</sub> SO <sub>4</sub>     | 10 mA cm <sup>-2</sup>       | 47                            | 13               |
| CoS P/CNT                                                         | 0.5 M H <sub>2</sub> SO <sub>4</sub>     | 10 mA cm <sup>-2</sup>       | 64                            | 14               |
| Ni <sub>0.33</sub> Co <sub>0.67</sub> S <sub>2</sub><br>nanowires | 0.5 M H <sub>2</sub> SO <sub>4</sub>     | 10 mA cm <sup>-2</sup>       | 73                            | 15               |



**Table S3.** Comparisons of the overall water splitting performance for the IrTe NTs and some recently reported catalysts.

| <b>Catalysts</b> | <b>Electrolyte</b>                       | <b>Voltage at 10 mA cm<sup>-2</sup> (V)</b> | <b>Ref.</b>      |
|------------------|------------------------------------------|---------------------------------------------|------------------|
| <b>IrTe NTs</b>  | <b>0.5 M H<sub>2</sub>SO<sub>4</sub></b> | <b>1.53</b>                                 | <b>This work</b> |
| Ir-Ag nanotubes  | 0.5 M H <sub>2</sub> SO <sub>4</sub>     | 1.55                                        | 16               |
| Ir-SA@Fe@NCNT    | 0.5 M H <sub>2</sub> SO <sub>4</sub>     | 1.51                                        | 17               |
| Co-RuIr          | 0.1 M HClO <sub>4</sub>                  | 1.52                                        | 18               |
| IrNi NCs         | 0.5 M H <sub>2</sub> SO <sub>4</sub>     | 1.58                                        | 3                |
| IrCoNi/CFP       | 0.5 M H <sub>2</sub> SO <sub>4</sub>     | 1.56                                        | 19               |
| RhCo-ANAs/CF     | 0.5 M H <sub>2</sub> SO <sub>4</sub>     | 1.51                                        | 20               |

## References

- 1 Q. R. Shi, C. Z. Zhu, D. Du, J. Wang, H. B. Xia, M. H. Engelhard, S. Feng and Y. H. Lin, *J. Mater. Chem. A*, 2018, **6**, 8855-8859.
- 2 L. Fu, F. Yang, G. Cheng and W. Luo, *Nanoscale*, 2018, **10**, 1892-1897.
- 3 Y. Pi, Q. Shao, P. Wang, J. Guo and X. Huang, *Adv. Funct. Mater.*, 2017, **27**, 1700876.
- 4 T. Reier, Z. Pawolek, S. Cherevko, M. Bruns, T. Jones, D. Teschner, S. Selve, A. Bergmann, H. N. Nong, R. Schlogl, K. J. Mayrhofer and P. Strasser, *J. Am. Chem. Soc.*, 2015, **137**, 13031-13040.
- 5 T. Kwon, H. Hwang, Y. J. Sa, J. Park, H. Baik, S. H. Joo and K. Lee, *Adv. Funct. Mater.*, 2017, **27**, 1604688.
- 6 J. Park, Y. J. Sa, H. Baik, T. Kwon, S. H. Joo and K. Lee, *ACS Nano*, 2017, **11**, 5500-5509.
- 7 P. Lettenmeier, L. Wang, U. Golla-Schindler, P. Gazdzicki, N. A. Canas, M. Handl, R. Hiesgen, S. S. Hosseiny, A. S. Gago and K. A. Friedrich, *Angew. Chem., Int. Ed.*, 2016, **55**, 742-746.
- 8 M. Aizaz Ud Din, S. Irfan, S. U. Dar and S. Rizwan, *Chem. Eur. J.*, 2020, **26**, 5662-5666.
- 9 F. Lv, W. Zhang, W. Yang, J. Feng, K. Wang, J. Zhou, P. Zhou and S. Guo, *Small Methods*, 2019, **4**, 1900129.
- 10 C. Wang, Y. Sui, M. Xu, C. Liu, G. Xiao and B. Zou, *ACS Sustainable Chem. Eng.*, 2017, **5**, 9787-9792.
- 11 Y. Zheng, Y. Jiao, Y. Zhu, L. H. Li, Y. Han, Y. Chen, M. Jaroniec and S. Z. Qiao, *J. Am. Chem. Soc.*, 2016, **138**, 16174-16181.
- 12 L. Zhu, H. Lin, Y. Li, F. Liao, Y. Lifshitz, M. Sheng, S. T. Lee and M. Shao, *Nat. Commun.*, 2016, **7**, 12272.

- 13 Y. Cheng, S. Lu, F. Liao, L. Liu, Y. Li and M. Shao, *Adv. Funct. Mater.*, 2017, **27**, 1700359.
- 14 W. Liu, E. Hu, H. Jiang, Y. Xiang, Z. Weng, M. Li, Q. Fan, X. Yu, E. I. Altman and H. Wang, *Nat. Commun.*, 2016, **7**, 10771.
- 15 Z. Peng, D. Jia, A. M. Al-Enizi, A. A. Elzatahry and G. Zheng, *Adv. Energy Mater.*, 2015, **5**, 1402031.
- 16 M. W. Zhu, Q. Shao, Y. Qian and X. Q. Huang, *Nano Energy*, 2019, **56**, 330-337.
- 17 F. Luo, H. Hu, X. Zhao, Z. Yang, Q. Zhang, J. Xu, T. Kaneko, Y. Yoshida, C. Zhu and W. Cai, *Nano Lett.*, 2020, **20**, 2120-2128.
- 18 J. Shan, T. Ling, K. Davey, Y. Zheng and S. Z. Qiao, *Adv. Mater.*, 2019, **31**, 1900510.
- 19 J. Feng, F. Lv, W. Zhang, P. Li, K. Wang, C. Yang, B. Wang, Y. Yang, J. Zhou, F. Lin, G. C. Wang and S. Guo, *Adv. Mater.*, 2017, **29**, 1703798.
- 20 Y. Zhao, J. Bai, X. R. Wu, P. Chen, P. J. Jin, H. C. Yao and Y. Chen, *J. Mater. Chem. A*, 2019, **7**, 16437-16446.
